# Supplementary material for: A drug stabilizable GAL80ds for conditional control of gene expression via GAL4-UAS and CRISPR-Cas9 systems in Drosophila
Source: PubMed Central journal article supplement (PMC10928143; doi:10.1038/s41598-024-56343-4), 2024-03-11
Supplement: 41598_2024_56343_MOESM1_ESM.pdf [file 41598_2024_56343_MOESM1_ESM.pdf]

## Supplementary information

# A drug stabilizable GAL80<sup>ds</sup> for conditional control of gene expression via GAL4-UAS and CRISPR-dCas9 systems for *Drosophila*

Vaishnavi Kogenaru,<sup>1,2</sup> Mark Isalan<sup>3,4</sup> and Manjunatha Kogenaru<sup>3,4,5,6\*</sup>

<sup>1</sup>Ricards Lodge High School, Lake Road, Wimbledon, London, SW19 7HB, United Kingdom.

<sup>2</sup>West Windsor-Plainsboro High School South, 346 Clarksville Rd, Princeton Junction, NJ 08550, USA.

<sup>3</sup>Department of Life Sciences, Imperial College London, London, SW7 2AZ, United Kingdom.

<sup>4</sup>Imperial College Centre for Synthetic Biology, Imperial College London, London, SW7 2AZ, United Kingdom.

<sup>5</sup>Neuroscience Institute, NYU Langone Medical Center, 435 E 30<sup>th</sup> St., New York, NY 10016, USA.

<sup>6</sup>Present address: Institute for Systems Genetics, NYU Langone Medical Center, 435 E 30<sup>th</sup> St., New York, NY 10016, USA.

\*Correspondence: [Manjunatha.Kogenaru@nyulangone.org](mailto:Manjunatha.Kogenaru@nyulangone.org)

**attB40 recombinase site for ΦC31 recombinase mediated cassette exchange**

*aTub84B tubulin promoter*

**SV40 nuclear localization signal (NLS)**

ecDHER22 destabilizing domain (DD)

**GAL80 inhibitor of Gal4 transcriptional activator**

T2A 2A self-cleaving peptide

*mCherry fluorescent marker*

SV40 late polyadenylation signal

a - single architecture

```
CGGGTGCCAGGGCGTGCCCTTGGGCTCCCCGGGCGCGTACGCTAGCGCTACTCAGATCTTAAGAAACCATTATTA
TCATGACATTAACCTATAAAAAATAGGCGTATCACGAGGCCCTTTCGTCTTCAAGGAATTCGATATCAAGCTTGCA
CAGGTCTGTTCGATAACGTCGTACTCGGGAATCACCTTAACTTGTCCGCTATTGGGTATTTGCTCTAAACAC
ATTTCGTAATCTCTCCACAATCATTGCCCTGGCCTCTGCAATGTAAAAAGTATTTATAAAATATCGCTGGCTCTA
AAGGAAACATATTAATCAAAGTATTGAGGCTTTATCAATCTAACATTTACAAGTAGTCAGACCACAATTTTTAGA
CTGCACTTCTGCGTAAAGTAAATGAAATGAAATGGTGACCTACTCTTGGGTAGCCGTACTGTTATATGCTGACGAG
CCTTCACCTGGGCTGCTTTTTTCTCTGTTTCGTCTGATCGCTCGGATGCGGCTGGACTGGCTGATTGTTGGGAT
TGGGTTTTGGATGCTGCTCCGAAAGGTGGGCCACAGCTTTTGGCATGGTGGTGGCCACTATGCGGTTGCTGCAGG
AACTACAGCTGAATGTTTCGCTTTATTGTCTGCAGCTCCTGGGGCTGGACGAAGGCCACGCCCTCACCCGGTGCGG
CCATCTCCTGCGGCAAAACGTATGTGGGATTCTGTCCAAGTAGCTCTCGATGCCACCATAATGCGCTCCAGCA
GGTTGGCCAGGTGCGGGTCTAGCTGCGGCGGATTCGTTCGTCTGGTTCAGTCTTAGGGTCTGCAGAAAGAAGT
GTGCCTCCATGGTAAGCGGATTCATCTGCACGATCAGCGGGCTTTAGTCTAAAAATTCGAATGATACAAACTCGT
ACTCACGTAAAGCAGTTTTGTTTGGCATCATCTCGGCCATCGTCTTATTCTTCTTCTGCTGGCCTTTGTTACCGGAGC
GGCTATGTTGGGCGCGGTGGAGCCCGAAGCTGAAAGGTTAATCGAATGCGTTAACTTTTCTGCAACTCGAAAGT
TTGCCGCTTTGTTTCGACTGCCAATAACTGTTGATTCGAAAATTCGAATCGAAGCGGTTGAATTTTCGTAGGGTGG
CCAATAACACAAAGTTTCGCCGGCGGTGTATGCATGTGAGTGTGAGTGTGACAGTGGGTGTACGTGTGCTTTAAG
CGACACAATCGCACCGGATGTACATATTTTTGTAGTAATGTGTGTGCATTTTTCTGTCGGATCACGGCTCCATA
AAATAAATCATATCACAGGGCTCAGGGATTTGTGAGTAGAAGTTCCCGCCACTTAAACGTCACCTTGTGAAATCGC
CATCGACGGTCAACTTTTTACTCACACTGGTCTTTTCGCGGACGGACCGTCTCAAAGTACTGCCTTTCTGCGTTGGA
AAACATCGCCTTTTTCTGTCAAAAGGAGTCCCAGGTTTCGATCCGCATGGCGTTGTGCGTGCCTTTCTTTTT
CAAATGATTACGGCTATTAACCTGGGGGCGTTAAGTTGGAAACACGTAATTCAGACTGCGATTAGAGTGACCA
TGAGTAGGAGTTCAAAATCTCTGACATCATTTTCTTAAAACCTGCTTTGTTTTTACATTTCTATTTAATATAA
CTCTATTTGAATAAAAAAACAAGTTTAGATGTTAAGATATTAACACATCCTTTGCTCCAAAGGGAGAG
```

GGGAAGTTATGGAGTTAATTAATTTGCTGTTGAAAATCAATATGGAGTCAGAAAATAAATGATTACTAAACCTT  
ATTGAATCGGTAACGATGCGAATTTATATTAATAAGCTTTTTATGAAACATTCAACAAAAATATTATTAATGTTG  
GCCACTTTAGCAACCGGTTAGGTCTACCGGTTGGGCAAGCAAAGATTCACGCCCTGGTTCGAGTCCCACTAGT  
CCTGCAAAAATACCGCAGCAAGTTTTAGAGAGACCAAGTGCCATTACCTCTCCCACTTCAGTTATCGGTTATGCGG  
CGTTTAAGTCGACAGCTTGCCGTCTCTAGCTCCGGTGCCTATATAAAGCAGCCCGCTTCCACATTTTCATATTCG  
TTTTACGTTTGTCAAGCCTCATAGCCGGCAGTTCGAACGTATACGCTCTCTGAGTCAGACCTCGAAATCGTAGCT  
CTACACAATTCTGTGAATTTTCTTGTGCGGTGTGAAACACTTCCAATAAAAACTCCTGCAGGTGAGTACTTTAA  
AAAAAATCTAGTGAATAATGCTGAAAAGAAATTTGTGTGGGCAAAATTCATGGGCAAAAACCGGATGCGGCT  
TTTTCTCAAAATGGCGGCCGGCTGCGTTTTTTTCTCAAAAGTGATGACGTCATGCCGTGTTTTTTTTTTTTTGT  
CGCAATGAGGAATGGCTCTTAAAAATCTACTAGATAAAAAAATATTCATTATTTCTATGCTGCTGGAACGCTTCA  
TTAATCTTAAAAATTTCTAAATTCGGTTACCATGATACTTCGACGCATAACTGTAGATTTTGGATAGAATTAAGA  
GAAAATGGCGAGAGAGTAAAATTCGGCGTCGGCAAAGTAGAGCAAAAAATCAGTATACCATTTAGCTACCTCT  
CTCACTCGCACGAGTCCGGCTCAAGTTGGGCGCGGCTCTGCAATTATCGATTTTCTTGGGGTGTGTAACATA  
CATCCGTTTTCCCTTCTCTCATCCACAGCGTGAAGGTACC GCGGGCCCGGATCCACCGTAATCAAC**ATGCC**  
**ACCCAAGAAGAAGCGAAAAGTA**ATGATCAGTCTGATTGCGGCGTTAGCGGTAGATCACGTTATCGGCATGGAAA  
CGCCATGCCGTGGAGCCTGCCTGCCGATCTCGCTGGTTTTAAACGCAACACCTTAAATAAACCCGTGATTATGGG  
CCGCCATACCTGGGAATCAATCGGTGCTCCGTTGCCAGGACGCAAAAAACATTATCCTCAGCAGTCAACCGAGTAC  
GGACGATCGCGTAACGTGGGTGAAGTCGGCGGATGAAGCCATCGCGGCGTGTGGTGACGTACCAGAAATCATGGT  
GATTGGCGGCGGTCGCGTTTATGAGCAGTCTTCCAAAAGCGCAAAAACTGTATCTGACGCATATCGACGCAGA  
AGTGGGAGGCGACACCCATTTCCCGGATTACGAGCCGGATGACTGGGGATCGGTATTCAGCGAATTCACGATGC  
TGATGCGCAGAATCTCACAGCTATTGCTTTGTGATTCTGGGGCGGCGA**ATGGATTACAACAAAAGGAGTAGTGT**  
**GAGTACGGTGCCGAATGCTGCTCCCATTCGCGTGGGCTTCGTGGGATTGAACCGCGGCTAAGGGTTGGGCCATTAA**  
**AACGCATTATCCAGCCATACTGCAGCTGAGCTCCAGTTCCAAATAACAGCGCTTTATTTCCCCCAAGATCGAGAC**  
**GTCCATTGCGACAATTCAGAGGCTGAAGTTGTCCAACGCCACAGCTTTCCCAACACTCGAGAGCTTCGCCTCGAG**  
**CTCCACGATCGATATGATTGTGATCGCAATCCAGGTGGCTTCCACTACGAGGTGGTAATGCCCTGCTCGAGTT**  
**TTCGAAGAACAATCCTAATCTGAAGTATTTGTTTGTGGAATGGGCACTGGCTGCTCGCTCGATCAGGCGGAGTC**  
**GATCTATAAGGCCGCTGCAGAGCGGGCGTCAAAACAATAATCAGTCTGCAGGGACGAAAGAGCCCGTACATTTT**  
**GCGGGCAAAAGAGCTTATCTCCAGGGCTACATCGGCGATATAAATAGCATCGAGATTGCAGGTAACGGAGGTTG**  
**GTACGGTTACGAGCGGCCGGTGAAAAGCCCCGAAATACATTTACGAGATCGGAAACGGAGTTGATCTGGTGACCAC**  
**CACGTTCCGGTTCACACGATAGATATATTGCAGTACATGACCAGTTCTGACTTCAGCCGTATCAATGCCATGGTGT**  
**TAACAACATTCCAGAACAGGAGCTCATTGATGAGAGGGCAATCGCTGGGCCAGCGGGTCCCAAAGACTGTCCC**  
**AGATCATCTCTTGTTCAGGGCACGCTGCTCAACGAAATGTTTCTGTGTCTGTTCCTTTAAGGGAGGCAAGCC**  
**TACGAAAAGTTACCAAGAATCTGGTCATAGATATCCATGGTACAAAAGGGTGATCTGAAGCTGGAGGGTGACGC**  
**TGGATTTGCGGAAATCTCGAATCTCGTTCTGTATTATTTCGGGCACCCCGCCCAATGATTTTCCCTGGCCAAATGG**  
**TCAGCAGGCACCCCTTGACCCCCGGCTACGACGCAGGCAAGGAGATTATGGAGGTGTATCACCTCCGAAACTACAA**  
**CGCGATCGTTGGTAATATACACCGGCTCTACCAGAGTATCAGCGATTTCCACTTCAACACCAAGAAAATCCCGA**  
**GCTTCCATCGCAGTTTCGTAATGCAAGGCTTCGATTTGAAAGGCTTTCCACCCTGATGGATGCCTTGATCTTGCA**  
**TCGCCTGATTGAAAGTGTCTACAAGTCAATATGATGGCAGTACCCTGAATGTTTCCAACATCTCCCACTACTC**  
**GCTTGGCGGCCGGAAGGACGCGGCAGCCTACTGACTTGGCGAGATGTGGAAGAGAACCCTGGCCCTGGTTCCGA**  
TATCTCTAGAGCCACCGTGTCCAAGGGCGAAGAGGACAACATGGCCATCATCAAGGAGTTCATGCGGTTCAAGGT  
GCACATGGAAGGCAGCGTGAACGGCCACGAGTTTCGAGATCGAGGGCGAGGGCGAAGGCAGGCCCTACGAGGGCAC  
CCAGACCGCCAAGCTGAAGGTGACCAAGGGCGGACCTCTGCCCTTCGCTGGGACATCCTGAGCCCCAGTTCAT  
GTACGGCAGCAAGGCCTACGTGAAGCACCCCGCCGACATCCCCGACTACCTGAAGCTGTCTTCCCCGAGGGATT  
CAAATGGGAGCGGGTGATGAACTTCGAGGACGGCGGCGTGGTGACCGTGACCCAGGACAGCAGCCTGCAGGACGG  
CGAGTTCATCTACAAGGTGAAAATGCGGGGCACCAACTTCCCCAGCGACGGCCCCGTGATGCAGAAAAGACCAT  
GGGCTGGGAGGCCAGCAGCGAGCGGATGTACCCCGAGGATGGCGCCCTGAAGGGCGAGATCAAGCAGCGGCTGAA  
GCTGAAGGATGGCGGCCACTACGACGCCGAGGTGAAAACCACCTACAAGGCCAAGAAACCCGTGCAGCTGCCTGG  
CGCTACAACGTGAACATCAAGCTGGACATCACAGCCACAACGAGGACTACACCATCGTGGAGCAGTACGAGCG  
GGCCGAGGGCAGACACAGCACCGGCGCATGGACGAGCTGTATAAATG**AGCT**TAGACATGATAAGATACATTGA  
TGAGTTTGGACAAACCACAACACTAGAATGCAGTGAAAAAAATGCTTTATTTGTGAAATTTGTGATGCTATTGCTTT  
ATTTGTAACCATTATAAGCTGCAATAAACAAGTTAAACAACAACATTCGATTCATTTTATGTTTTCAGGTTTCAGGG  
GGAGGTGTGGGAGGTTTTTTTAAAGCAAGTAAAACCTCTACAAATGTGGTATGGCTGATTATGATCACATAT**GTA**  
**CGCGCCCGGGGAGCCCAAGGGCACGCCCTGGCACCCG**

b - double architecture

**CGGGTGCCAGGGCGTGCCCTTGGGGCTCCCCGGGCGCGTAC**GCTAGCGCTACTCAGATCTTAAGAAACCATTATTA  
TCATGACATTAACCTATAAAAAATAGGCGTATCACGAGGCCCTTTCGTCTTCAAGGAATTCGATATCAAGCTTGCA  
CAGGTCCTGTTTCGATAACGTCGTAACGCGGAATCACCTTTAACTTGTCCGCTATTGGGTATTTGTCCTTAAACAC  
ATTGTAATCTCTCCACAATCATTGCCCTGGCCTCTGCAATGTAAAAAGTATTTATAAAATATCGCTGGCTCTA  
AAGGAAACATATTAATCAAAGTATTGAGGCTTTATCAATCTAACATTTACAAGTAGTCAGACCACAATTTTTAGA  
CTGCACTTCTGCGTAAGTAAATGAAATGAAATGGTGACCTACTCTTGGGTAGCCGTACTGTTATATGCTGACGAG  
CCTTCACCTGGGCTGCTTTTTCTCCTGTTTCGTCTGATGCGTCGGATGCGGCTGGACTGGCTGATTGTTGGGAT  
TGGGTTTTGGATGCTGCTCCGAAAGGTGGGCCACAGCTTTTGCATGGTGGTGGCCACTATGCGGTTGCTGCAGG  
AACTACAGCTGAATGTTTCGCTTTATTGTCTGCAGCTCCTGGGGCTGGACGAAGGCCACGCCCTCACCCGGTGGG  
CCATCTCCTGCGGCAAAACGTATGTGGGATTCTGTCCAAGTAGCTCTCGATGCCACCATAATGCGCTCCAGCA  
GGTTGGCCAGGTGCGGGTCTAGCTGCGGCGGATTCTGTCGTCTGGTTCACTGAGTTTAGGGTCTGCAGAAAAGAAGT  
GTGCCTCCATGGTAAGCGGATTCATCTGCACGATCAGCGGGCTTTAGTCTAAAAATTCGAATGATACAAACTCGT  
ACTCACGTAAAGCAGTTTGTGGCATCATCTCGGCCATCGTCTTATTCTTCTTCTGCTGGCCTTTGTTACCGGAGC  
GGCTATGTTGGGCGCGGTGGAGCCCGAAAGCTGAAAGGTTAATCGAATGCGTTAACTTTCTGCAACTCGAAAGT  
TTGCCGCTTTGTTGACTGCCAATAACTGTTGATTGAAAATTCGAATCGAAGCGGTTGAATTCGTAGGGTGG  
CCAATAACACCAAGTTTCGCCGGCGGTGTATGCATGTGAGTGTGAGTGTGACAGTGGGTGTACGTGTGCTTTAAG  
CGACACAATCGCACCGCGATGTACATATTTTTGTAGTAATGTGTGTGCATTTTTCTGTCGGATCACGGCTCCATA  
AAATAAATCATATCACAGGGCTCAGGGATTTGTGAGTAGAAGTTCCCGCCACTTAAACGTCACCTTGTGAAATCGC  
CATCGACGGTCAACTTTTACTCACACTGGTCTTTTCGCGGACGGACCGTCTCAAAGTACTGCCTTTCTGCGTTGGA  
AAACATCGCCTTTTTCTGTCAAAAGGAGTCCCAGGTTTCGATCCGCATGGCGTTGTGCGTGCCTTTCTTTT  
CAAATGATTACGGCTATTAACCTGGGGGCGTTAAGTTGGAAACACGTAAATTCAGACTGCGATTAGAGTGACCA  
TGAGTAGGAGTTCAAATCTCCTGACATCATTTTTCTTAAACCTGCTTTGTTTTTTTACATTTCTATTTAATAA  
CTCCTATTTGAAATAAAAAACAACAAGTTTAGATGTTAAGATATTAACACTACATCCTTTGCTCCAAAGGGAGAG  
GGGAAGTTATGGAGTTAATTAATTTGCTGTTGGAAATCAATATGGAGTCAGAAATATAATGATTTACTAAACCTT  
ATTGAATCGGTAACGATGCGAATTTATATTAATAATAGCTTTTATGAAACATTCAACAAAAATATTATTAATGTTG  
GCCACTTTAGCAACCGGTTAGGTCTACCGGTTGGGCAAGCAAAGATTCACGCCCTGGTTCGAGTCCCAACTAGT  
CCTGCAAAATACCGCAGCAAGTTTLAGAGAGACCAAGTGCCATTACCTCTCCACTTCAGTTATCGGTTATGCGG  
CGTTTAAAGTCGACAGCTTGGCGTCTAGCTCCGGTGCCTATATAAAGCAGCCCGCTTCCACATTTATATTCG  
TTTTACGTTTGTCAAGCCTCATAGCCGGCAGTTTCGAACGTATACGCTCTCTGAGTCAGACCTCGAAATCGTAGCT  
CTACACAATTTCTGTGAATTTTCTTGTGCGGTGTGAAACACTTCCAATAAAAACTCCTGCAGGTGAGTACTTTAA  
AAAAAATCTAGTGAAATAATGCTGAAAAGAAATTTGTGTGGGCAAAATTC AATGGGCAAAAACGCGATGCGGCT  
TTTTCTCAAATGGCGGCCGCTGCGTTTTTCTCAAAGTGATGACGTCATGCCTGTTTTTTTTTTTTTTGTT  
CGCAATGAGGAATGGCTCTTAAATCTACTAGATAAAAAAATATTCAATTTTCTATGCTGCTGGAACGCTTCA  
TTAATCTTAAATTTCTAAATTCGGTTACCATGATACTTCGACGCATAACTGTAGATTTTGGATAGAATTAAGA  
GAAAATGGCGAGAGAGTAAATTCGGCGCTCGGCAAAAGTAGAGCAAAAAATCAGTATACCATTTAGCTACCTCT  
CTCACTCGCACGAGTGGCGGCTCAAGTTGGGCGCGCTCTGCAATTATCGATTTTCTTGGGGTGTGTAACATAAT  
CATCCGTTTTCCCTTCTCCTCATCCACAGCGTGAAGGTACCGCGGGCCCGGATCCACCGTAATCAAC**ATGCC**  
**ACCCAAGAAGAAGCGAAAAGTA**ATGATCAGTCTGATTGCGGCTTAGCGGTAGATCACGTTATCGGCATGGAAA  
CGCCATGCCGTGGAGCCTGCCTGCCGATCTCGCTGGTTTAAACGCAACACCTTAAATAAACCCGTGATTATGGG  
CCGCCATACCTGGGAATCAATCGGTGCTCCGTTGCCAGGACGCAAAAAATATCCTCAGCAGTCAACCGAGTAC  
GGACGATCGCGTAACGTGGGTGAAGTCCGGCGGATGAAGCCATCGCGGCTGTGGTGACGTACCAGAAATCATGGT  
GATTGGCGGCGGTGCGTTTTATGAGCAGTTCTTGCCAAAAGCGCAAAAACTGTATCTGACGCATATCGACGCAGA  
AGTGGGAGGCGACACCCATTTCCCGGATTACGAGCCGGATGACTGGGGATCGGTATTCAGCGAATTCACGATGC  
TGATGCGCAGAACTCTCACAGCTATTGCTTTGTGATTCTGGGGCGCGA**ATGGATTACAACAAAAGGAGTAGTGT**  
**GAGTACGGTGCCGAATGCTGCTCCATTGCGGTGGGCTTCGTGGGATGAAACGCGGCTAAGGGTTGGGCCATTAA**  
**AACGCATTATCCAGCCATACTGCAGCTGAGCTCCAGTTCCAAATAACAGCGCTTTATTTCCCCAAGATCGAGAC**  
**GTCCATTGCGACAATTCAGAGGCTGAAGTTGTCCAACGCCACAGCTTTCCCAACACTCGAGAGCTTCGCCCTCGAG**  
**CTCCACGATCGATATGATTGTGATCGCAATCCAGGTGGCTTTCCCACTACGAGGTGGTAATGCCCTGCTCGAGTT**  
**TTCGAAGAACAATCCTAATCTGAAGTATTTGTTTGTGGAATGGGCACTGGCTGCTCGCTCGATCAGGCGGAGTC**  
**GATCTATAAGGCCGCTGCAGAGCGGGCGTGCAAAACAATAATCAGTCTGCAGGGACGAAAGAGCCCGTACATTTT**  
**GCGGGCAAAAGAGCTTATCTCCAGGGCTACATCGGCGATATAAATAGCATCGAGATTGCAGGTAACGGAGGTTG**

GTACGGTTACGAGCGGCCGGTGAAGAGCCCGAAATACATTTACGAGATCGGAAACGGAGTTGATCTGGTGACCAC  
 CACGTTTCGGTACACGATAGATATATTGCAGTACATGACCAGTTTCGTAATTCAGCCGTATCAATGCCATGGTGT  
 TAACAACATTCCAGAACAGGAGCTCATTGATGAGAGGGCAATCGCCTGGGCCAGCGGGTCCCAAAGACTGTCCC  
 AGATCATCTCTTGTTCAGGGCACGCTGCTCAACGGAAATGTTTCTGTGTCTTCTTCTTAAAGGGAGGCAAGCC  
 TACGAAAAAGTTCACCAAGAATCTGGTCATAGATATCCATGGTACAAAGGGTGTCTGAAGCTGGAGGGTGACGC  
 TGGATTTGCGGAAATCTCGAATCTCGTTCTGTATTATTTCGGGCACCCGCGCCAATGATTTTCCCTGGCCAATGG  
 TCAGCAGGCACCCTTGGACCCCGGCTACGACGCAGGCAAGGAGATTATGGAGGTGTATCACCTCCGAAACTACAA  
 CGCGATCGTTGGTAATATACACCGGCTTACCAGAGTATCAGCGATTTCCACTTCAACACCAAGAAAAATCCCCGA  
 GCTTCCATCGCAGTTTCGTAATGCAAGGCTTCGATTTTCAAGGCTTTCCACCCTGATGGATGCCCTTGATCTTGCA  
 TCGCCTGATTGAAAGTGTCTACAAGTCAAGATATGATGGGCAGTACCCTGAATGTTTCCAACATCTCCACTACTC  
 GCTTATGATCAGTCTGATTGCGGCGTTAGCGGTAGATCACGTTATCGGCATGGAAAACGCCATGCCGTGGAGCCT  
 GCCTGCCGATCTCGCCTGGTTTTAAACGCAACACCTTAAATAAACCCGTGATTATGGGCCGCCATACCTGGGAATC  
 AATCGGTTCGTCCGTTGCCAGGACGCAAAAACATTATCTCAGCAGTCAACCGAGTACGGACGATCGCGTAACGTG  
 GGTGAAGTCGGCGGATGAAGCCATCGCGGCGTGTGGTGACGTACCAGAAATCATGGTGATTGGCGGCGGTTCGCGT  
 TTATGAGCAGTTCTTGCCAAAAGCGCAAAAACGTATCTGACGCATATCGACGCAGAAAGTGGGAGGGCAGACCCCA  
 TTTCCCGGATTACGAGCCGGATGACTGGGGATCGGTATTCAGCGAATTCACGATGCTGATGCGCAGAACTCTCA  
 CAGCTATTGCTTTGTGATTCTGGGGCGGCGAGGCGGCCGGAAGGACGCGGCAGCCTACTGACTTGCAGGAGATGT  
 CGAAGAGAACCCTGGCCCTGGTTCCGATATCTCTAGAGCCACCCTGTCCAAGGGCGAAGAGGACAACATGGCCAT  
 CATCAAGGAGTTCATGCGGTTCAAGGTGCACATGGAAGGCAGCGTGAACGGCCACGAGTTCGAGATCGAGGGCGA  
 GGGCGAAGGCAGGCCCTACGAGGGCACCCAGACCCTCAAGCTGAAGGTGACCAAGGGCGGACCTCTGCCCTTCGC  
 CTGGGACATCCTGAGCCCCCAGTTCATGTACGGCAGCAAGGCTACGTGAAGCACCCCGCGACATCCCCGACTA  
 CCTGAAGCTGTCTTCCCCGAGGGATTCAAATGGGAGCGGGTGTGAACTTCGAGGACGGCGGGCGTGGTGACCGT  
 GACCCAGGACAGCAGCCTGCAGGACGGCGAGTTCATCTACAAGGTGAAACTGCGGGGCACCAACTTCCCCAGCGA  
 CGGCCCCGTGATGCAGAAAAAGACCATGGGCTGGGAGGCCAGCAGCGAGCGGATGTACCCCGAGGATGGCGCCCT  
 GAAGGGCGAGATCAAGCAGCGGCTGAAGCTGAAGGATGGCGGCCACTACGACGCCGAGGTGAAAACCACCTACAA  
 GGCCAAGAAACCCGTGCAGCTGCCTGGCGCCTACAACGTGAACATCAAGCTGGACATCACCAGCCACAACGAGGA  
 CTACACCATCGTGGAGCAGTACGAGCGGGCCGAGGGCAGACACAGCACCCGGCGGCATGGACGAGCTGTATAAATG  
 AAGCTTAGACATGATAAGATACATTGATGAGTTTGGACAAAACCACAACCTAGAATGCAGTGAAAAAATGCTTTTAT  
 TTGTGAAATTTGTGATGCTATTGCTTTATTTGTAACCATTATAAGCTGCAATAAACCAAGTTAACACAACAATTG  
 CATTCAATTTTATGTTTCAGGTTTCAGGGGGAGGTGTGGGAGGTTTTTTAAAGCAAGTAAAACCTCTACAAATGTGG  
 TATGGCTGATTATGATCACATATG**GTACGCGCCCGGGGAGCCCAAGGGCACGCCCTGGCACCCG**

**Supplementary Figure 1. The DNA sequences of single and double architecture drug stabilizable GAL80<sup>ds</sup>.** Each architecture has the same *attB40* recombinase site for ΦC31 recombinase mediated transgenesis, constitutively driven by *αTub84B* tubulin promoter, *SV40* nuclear localization signal (NLS), *GAL80* inhibitor of *GAL4* transcriptional activator, *T2A* 2A self-cleaving peptide, *mCherry* fluorescent marker and *SV40* late polyadenylation signal, but one or two copies of *DHFR22-DD*. These single and double architecture *GAL80<sup>ds</sup>* transgene sequences were verified by Sanger sequencing and subsequently used for generating transgenic flies. **(a)** Single architecture drug stabilizable GAL80<sup>ds</sup>, DHFR-22 DD fusion to N-terminus of GAL80 (DD-GAL80) sequence. **(b)** Double architecture drug stabilizable GAL80<sup>ds</sup>, DHFR-22 DD fusion to both N- and C-termini of GAL80 (DD-GAL80-DD) sequence.
